# Supplementary material for: Morphology modulation and application of Au(i)–thiolate nanostructures
Source: Royal Society of Chemistry journal article supplement (doi:10.1039/c4ra06500j), 2014-09-25
Supplement: c4ra06500j1.pdf [file c4ra06500j1.pdf]

## Supporting Information

### **Morphology Modulation and Application of Au(I)-Thiolate**

#### **Nanostructures**

Hui Nie, Minjie Li,\* Yajiao Hao, Xudong Wang, Sheng Gao, Peng Wang, Bo Ju, Sean Xiao-  
An Zhang\*

State Key Lab of Supramolecular Structure and Materials, Jilin University, Changchun, P.R.  
China.

E-mail: liminjie@jlu.edu.cn, seanzhang@jlu.edu.cn

## Quantum yields (QY) measurements of photoluminescent Au clusters

Reference on quantum yields measurements: Lakowicz, J. R. *Principles of Fluorescence Spectroscopy*, 2<sup>nd</sup> Ed., 1999, Kluwer Academic/Plenum Publishers, New York. Fluorescence quantum yield was measured by using polymer-blend dots aqueous solution<sup>1</sup> ( $\Phi_F = 0.56$ ) for the red photoluminescent Au clusters and anthracene ethanol solution ( $\Phi_F = 0.27$ ) for the blue photoluminescent Au clusters as fluorescence standards. The absorbance of the sample at the excitation wavelength (optical density < 0.1 to minimize inner-filter effects) was matched with the standard. The quantum yield was calculated using the below equation:

$$\varphi_x = \varphi_{std} \left[ \frac{I_x}{A_x} \right] \left[ \frac{A_{std}}{I_{std}} \right] \left[ \frac{\eta_x}{\eta_{std}} \right]^2$$

Where  $\varphi$  is the quantum yield,  $I$  is the measured integrated emission intensity, and  $A$  is the optical density, and  $\eta$  the refractive index. The subscript “*std*” refers to the reference fluorophore of known quantum yield.

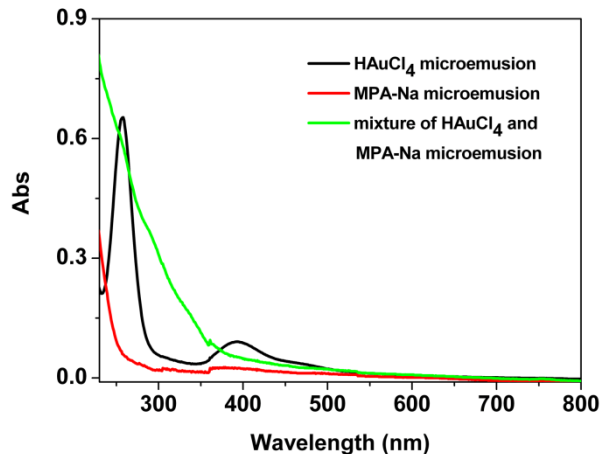

Fig. S1 UV-vis absorption spectra of HAuCl<sub>4</sub> microemulsion, MPA-Na microemulsion and their mixture (HAuCl<sub>4</sub> microemulsion and MPA-Na microemulsion mixed at room temperatures).



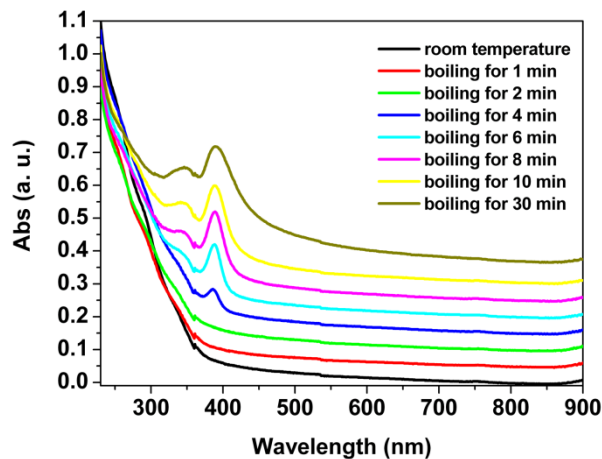

Fig. S5 UV-vis spectroscopic monitoring of the assembly of Au(I)-MPA CPs in microemulsion with  $w$  value of 20.

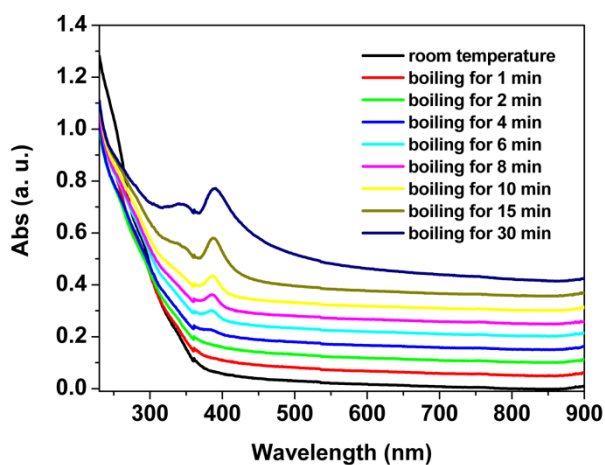

Fig. S6 UV-vis spectroscopic monitoring of the assembly of Au(I)-MPA CPs in microemulsion with  $w$  value of 40.

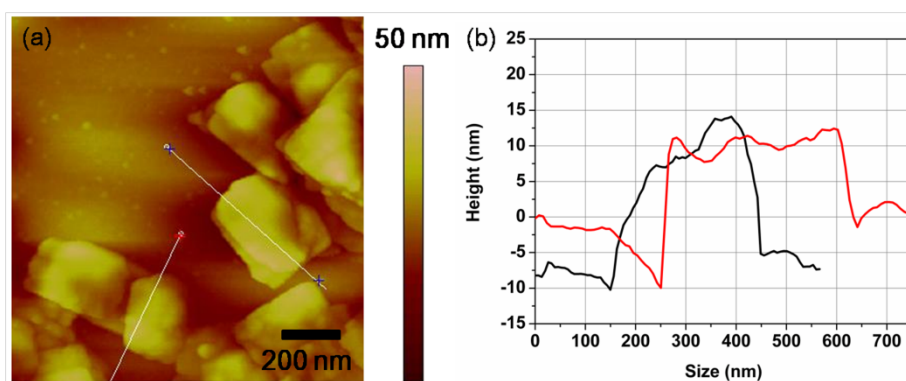

Fig. S7 AFM image and height analysis of M-Au(I)-MPA quasi-square nanosheets.

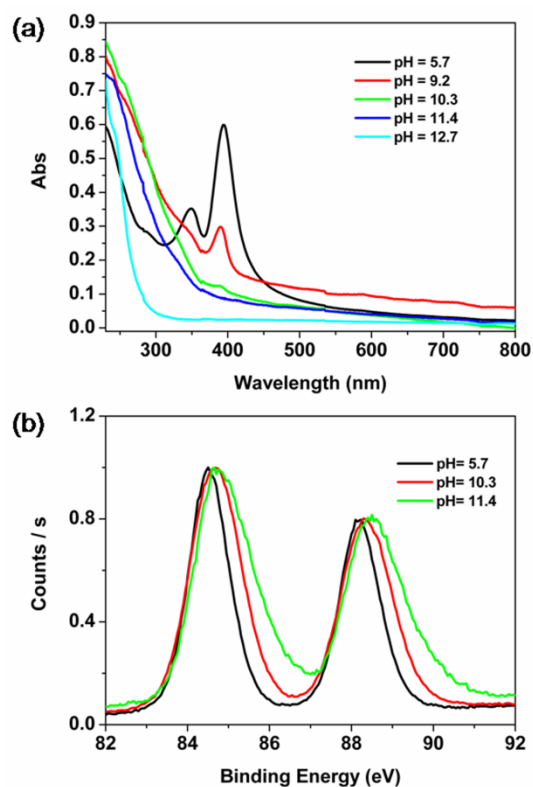

Fig. S8 UV-vis absorption spectra (a) and XPS patterns of Au 4f (b) for M-Au(I)-MPA nanostructures prepared from microemulsion systems with different pH values.

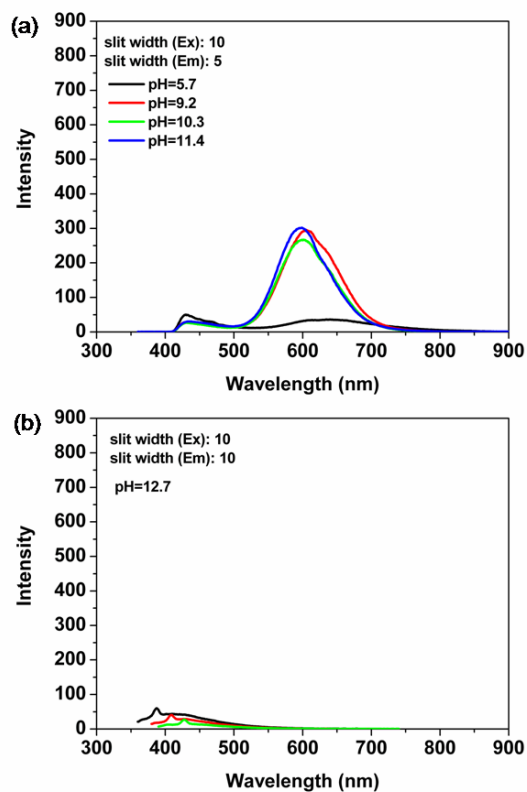

Fig. S9 (a) Photoemission spectra ( $\lambda_{\text{ex}}=350$  nm) of M-Au(I)-MPA nanostructures prepared with MPA-Na with pH values of 5.7, 9.2, 10.3 and 11.4, respectively,

[Au]= $5 \times 10^{-4}$  M, excitation and emission slit widths are 10 and 5. Two emission bands originated from the ligand to metal charge transfer (LMCT) and metal centered charge transfer (MMCT) were observed. (b) Photoemission spectra of Au(I)-MPA nanochips (pH value of MPA-Na reactant is 12.7) with excitation of 347 nm (black), 365 nm (red) and 380 nm (green), respectively, [Au]= $5 \times 10^{-4}$  M, almost no fluorescence peaks was observed at larger excitation and emission slit widths of 10 and 10.

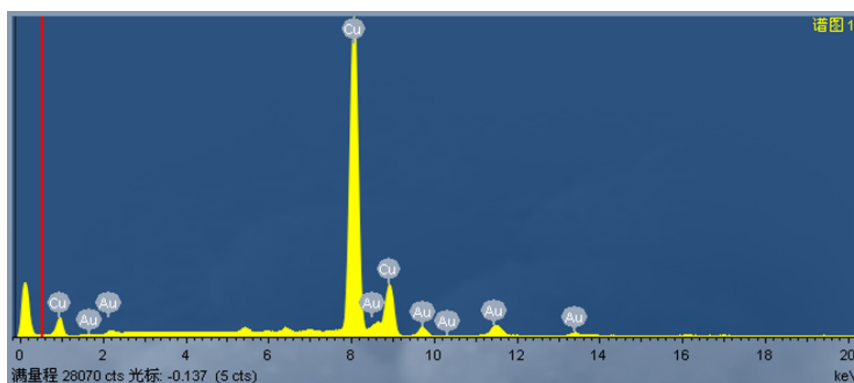

Fig. S10 EDX spectrum of the obtained Au particles. Au peaks were observed in the EDX spectra.

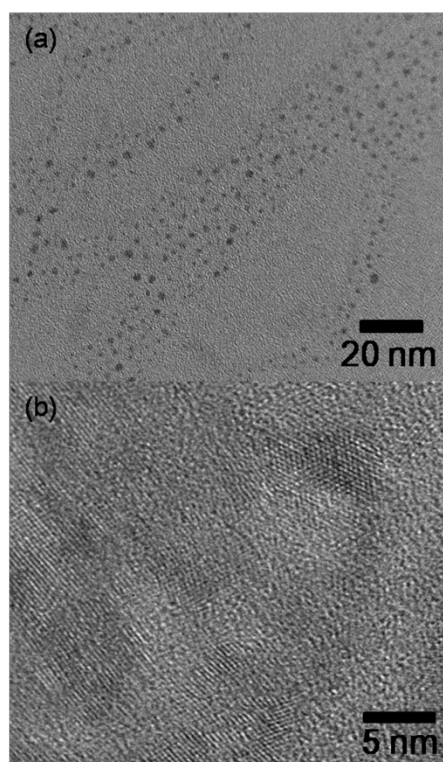

Fig. S11 TEM images of red (a) and blue (b) photoluminescent Au clusters.

## Reference

1. C. F. Wu, S. J. Hansen, Q. Hou, J. B. Yu, M. Zeigler, Y. H. Jin, D. R. Burnham, J. D. McNeill, J. M. Olson and D. T. Chiu, *Angew. Chem. Int. Ed.*, 2011, 50, 3430-

3434.
